# Supplementary figures and images for: Interference of citrate-stabilized gold nanoparticles with β2-microglobulin oligomeric association
Source: Royal Society of Chemistry journal article supplement (doi:10.1039/c8cc01053f), 2018-01-01

a)

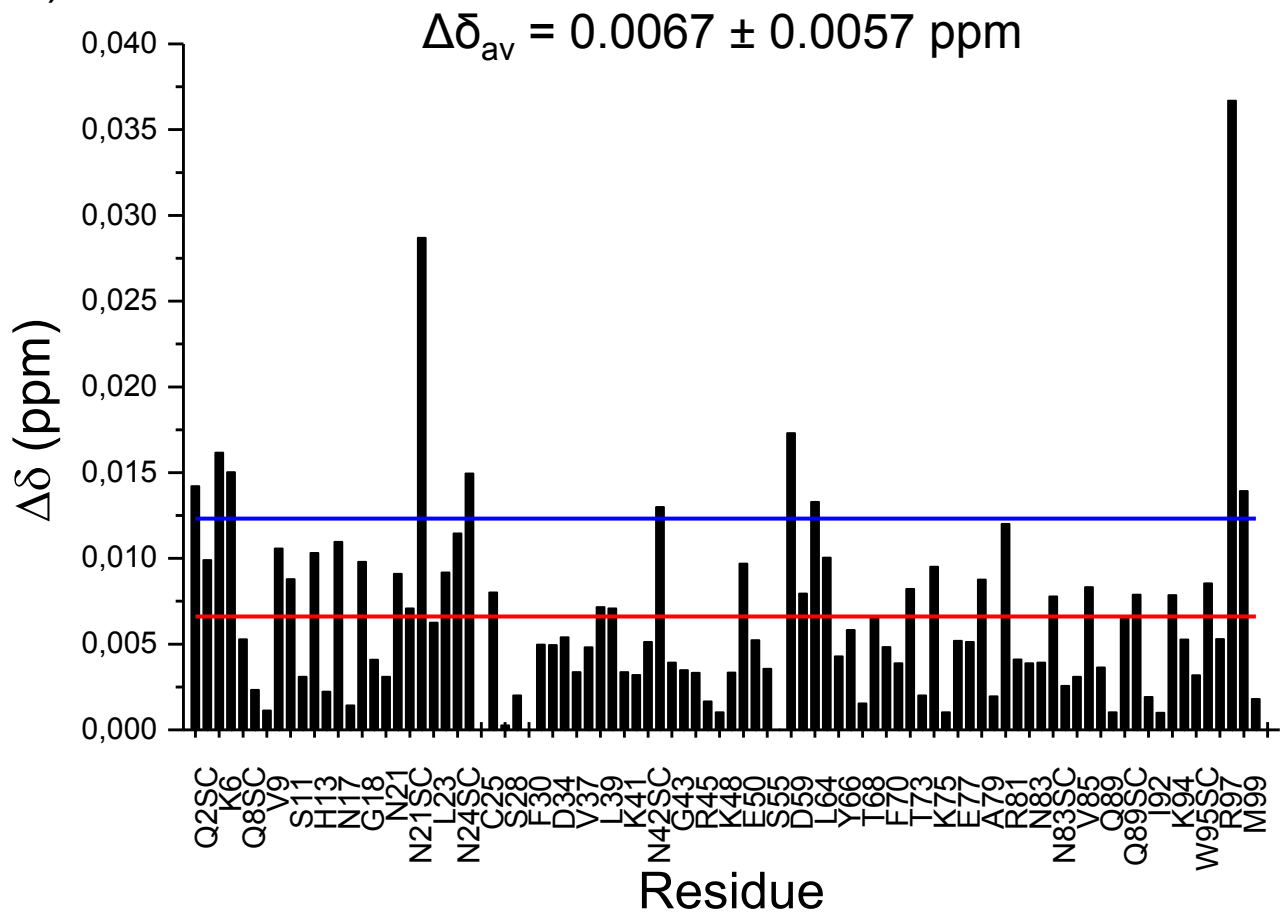

b)

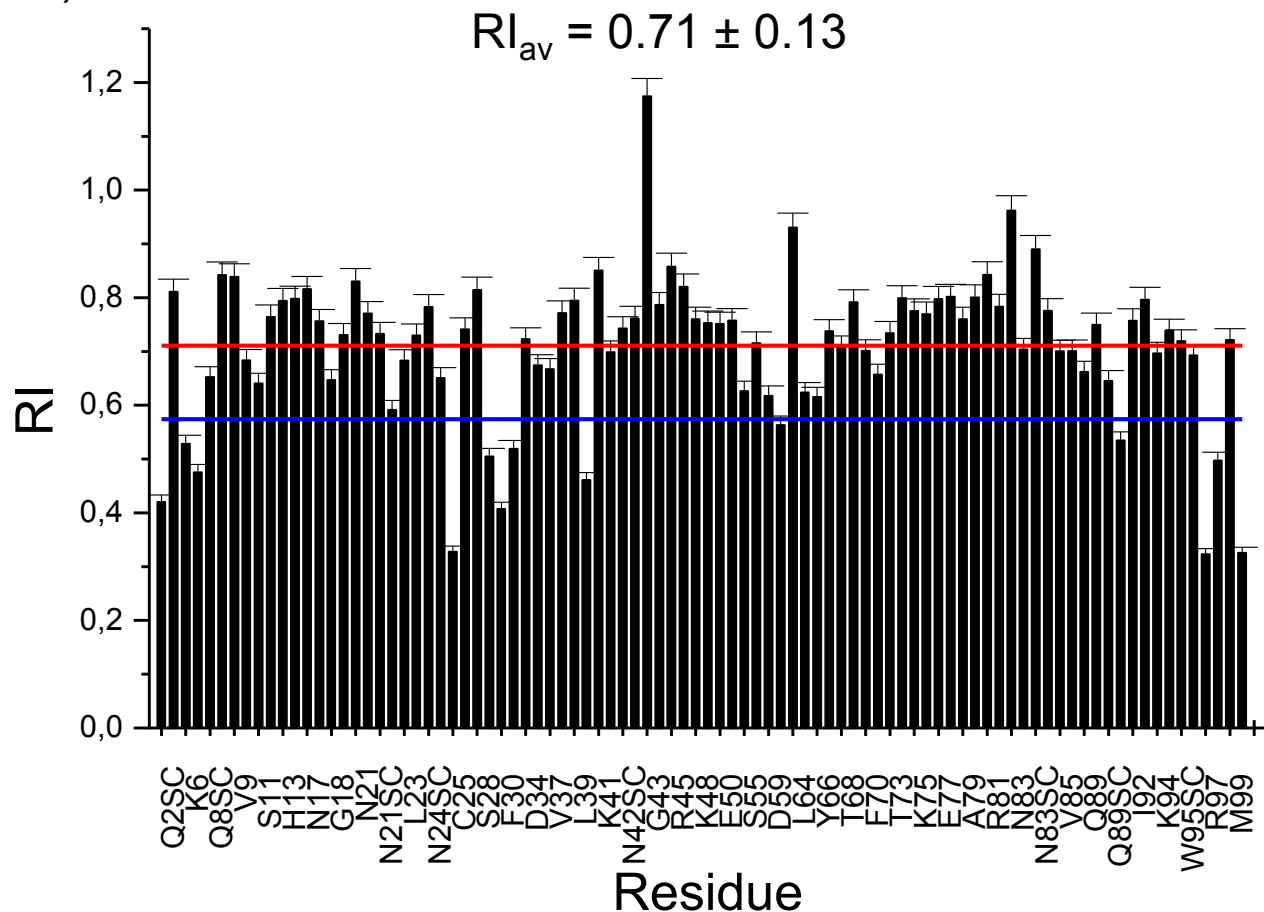

Supplement: c8cc01053f10.pdf [file c8cc01053f10.pdf]
